# Supplementary material
Source: PubMed Central journal article supplement (PMC3038755)
Supplement: 1018956108_pnas.201018956SI.pdf [file 1018956108_pnas.201018956SI.pdf]

# Supporting Information

Jönsson et al. 10.1073/pnas.1018956108

## SI Methods

**Dating Analyses.** We used the relaxed Bayesian molecular clock implemented in Multidivtime to estimate divergence dates (1, 2). The best fitting parameters for each gene were estimated in PAML (3) using the F84 model of nucleotide substitution and five discrete categories. These parameters were then entered into the program Estbranches to calculate the branch lengths of the rooted maximum likelihood (ML) tree from the analysis of the partitioned data set, and their variance-covariance matrix under each of the corresponding partitions. Second, a priori knowledge was incorporated as gamma distributions: (i) the root age, (ii) the substitution rate at the root, and (iii) the degree of autocorrelation among the substitution rates along the branches. These priors were specified as means and SDs of the three distributions according to the Multidivtime guidelines. The posterior distributions of node times were approximated through four independent Markov Chain Monte Carlo (MCMC) runs of 50 million generations and the “burn-in” was set at one million generations. Finally, convergence diagnostics were checked graphically.

To calibrate the tree to estimate absolute dates, we used a combination of geological calibration points (4) and secondary calibration points (5). We used (i) the age of Acanthisittidae versus other passerines at  $76 \pm 8$  My SD (age within 95% confidence intervals = 62.8–89.2 My), (ii) the age of Old World versus New World suboscines at  $70 \pm 2$  My SD (confidence intervals = 66.7–73.3 My), (iii) the split between *Menura noveahollandiae* and the rest of the oscines  $63 \pm 2$  My SD (confidence intervals = 59.7–66.3 My), and (iv) the split between *Coracina typica* from Mauritius and *Coracina newtoni* from Reunion at 1.5 million y (My)  $\pm$  0.25 SD (age within 95% confidence intervals = 1.09–1.91 My).

To further corroborate the absolute date estimates, we assessed the molecular rate of evolution for ND2 for nodes younger than 12 My. It has been shown that, for cytochrome *b*, the rate of evolution of ca. 2.1% per My is maintained over a 12-My interval for birds (6). The corresponding rate for ND2 has been demonstrated to be somewhat higher at approximately 2.8% per million years (7).

**Biogeographic Analyses. Bayes-diva.** We used Bayes-DIVA to elucidate ancestral patterns (8), with particular emphasis on the nodes around the core Corvoidea. In a standard dispersal-vicariance analysis (9), as implemented in the software DIVA (10), ancestral areas are optimized onto internal nodes of a phylogeny by minimizing the number of dispersal and extinction events required to explain the terminal distributions (11). We sampled 20,000 trees (by thinning the chain; i.e., sampling every  $n^{\text{th}}$  generation) from the MCMC output and ran DIVA on all of them. The frequency of ancestral areas for clades was then recorded and plotted as marginal distributions on the majority-rule consensus tree derived from the MCMC. The major advantage of the Bayes-DIVA method is that the marginal distributions for the alternative ancestral areas at each node in the tree are the product of the phylogenetic uncertainty in the rest of the tree and the uncertainty in the biogeographic reconstruction of the node of interest.

We assigned 10 geographic areas for the Bayes-DIVA analysis (Fig. 1), considering evidence of historical relationships of geological plates and terranes in the Indo-Pacific (12–14) but otherwise sticking to major continental areas. The analysis was carried setting maxareas = 2 but we also explored the importance of changing the maxareas (setting maxareas = 3, 4, and 5). **BayesTraits.** We used BayesTraits ver. 1.0 (15) to test the validity of New Guinea as the area of origin of the core Corvoidea.

BayesTraits estimates the instantaneous forward and backward rates among all specified states (in this case areas of origin) to compute probabilities of a state change in a given branch (16). To contrast the New Guinean origin hypothesis for the core Corvoidea clade, we used a local approach (17) and compared state reconstructions at this specific node (Node 2: core Corvoidea). Thus, we constrained the Most Recent Common Ancestor for the core Corvoidea node at one of the ten potential states (areas of origin). MCMC was used to explore the samples and the space of rate parameter values of 20,000 trees generated in the combined MrBayes analysis. Because we have no information concerning the rates, priors on uniform distributions were set between 0 and 100. BayesTraits computes the likelihood and a rate for any new combination in a tree. Using Metropolis-Hastings evaluation, this new state of the chain will be either accepted or rejected. The ratedev parameters (rate of parameter changes) were set at the start of each run. Accordingly, the acceptance rate of the proposed transition range between ranges between 20 and 40%. The MCMC chain was run for 10,000,000 generations and rate parameters were sampled every 10,000 generations. Two chains were run independently to sample rate parameters and to derive overall likelihoods of the reconstructions when the node of interest was constrained at its alternative state. Bayes factors were then calculated to determine the support for New Guinea compared with the nine remaining alternative biogeographic states.

**Lineage diversity.** To generate a visual overview of the distributions of the various clades of oscine passerine birds, we generated lineage diversity maps at the time when the proto-Papuan archipelago emerged in the Oligocene. Lineage diversity maps (Fig. 2) were generated from a global dataset of bird distributions (presence-absence data in a grid of  $1 \times 1^\circ$ ) (17) by combining the distributions of all species representing a lineage. We assumed that the current distribution of the representatives of a lineage represents the combined historical distribution of that lineage, and for visual presentation we overlaid the distributions of all lineages that had diverged at 25 Mya. For the core Corvoidea, we generated lineage diversity maps for three time frames (35, 30, or 25 Mya) to accommodate the uncertainty associated with any date estimate. We chose these points in time for two reasons: (i) they mark the transition between initial (deeper) branching of the core Corvoidea and several strong secondary radiations in some subgroups outside Australo-Papua; (ii) they mark the transition between the existence of isolated Papuan islands and continuous land connections with Australia (12, 13) (see maps in Fig. 1). Our assumption is that lineage endemism and the peak of lineage diversity reflects the center of radiation in the Late Eocene/Oligocene.

**Morphological measurements.** One of us (R.E.R.) measured two to four individuals of 158 species distributed among all lineages of contemporary species represented in the phylogenetic reconstruction at an age of 25 Mya. These individuals included 84 species from the 34 lineages of core Corvoidea, 36 species from the 12 transitional lineages, and 38 species from the 11 lineages of basal oscines (for details on number of lineages, see Tables S2 and S3). Measurements were made in several collections, including the Field Museum of Natural History in Chicago, the American Museum of Natural History in New York, the United States National Museum in Washington, D.C., and the Zoologisches Staatssammlung in Munich, Germany. Traits were the  $\log_{10}$ -transformed lengths of the wing, tail, tarsus, and middle toe, and the length, width, and depth of the culmen measured at the base (see ref. 19).

1. Kishino H, Thorne JL, Bruno WJ (2001) Performance of a divergence time estimation method under a probabilistic model of rate evolution. *Mol Biol Evol* 18:352–361.
2. Thorne JL, Kishino H (2002) Divergence time and evolutionary rate estimation with multilocus data. *Syst Biol* 51:689–702.
3. Yang Z (1997) PAML: A program package for phylogenetic analysis by maximum likelihood. *Comput Appl Biosci* 13:555–556.
4. Jönsson KA, et al. (2010) Biogeographical history of cuckoo-shrikes (Aves: Passeriformes): transoceanic colonization of Africa from Australo-Papua. *J Biogeogr* 37:1767–1781.
5. Barker FK, Cibois A, Schikler P, Feinstein J, Cracraft J (2004) Phylogeny and diversification of the largest avian radiation. *Proc Natl Acad Sci USA* 101:11040–11045.
6. Weir JT, Schluter D (2008) Calibrating the avian molecular clock. *Mol Ecol* 17:2321–2328.
7. Norman JA, Rheindt FE, Rowe DL, Christidis L (2007) Speciation dynamics in the Australo-Papuan *Meliphaga* honeyeaters. *Mol Phylogenet Evol* 42:80–91.
8. Nylander JAA, Olsson U, Alström P, Sanmartín I (2008) Accounting for phylogenetic uncertainty in biogeography: A Bayesian approach to dispersal-vicariance analysis of the thrushes (Aves: Turdus). *Syst Biol* 57:257–268.
9. Ronquist F (1997) Dispersal-vicariance analysis: A new approach to the quantification of historical biogeography. *Syst Biol* 46:195–203.
10. Ronquist F (1996) DIVA version 1.1. Computer program and manual. Available on request from Fredrik Ronquist (ronquist@csit.fsu.edu).
11. Ronquist F (2003) In *Tangled Trees: Phylogeny, Cospeciation, and Co-evolution*, ed Page RDM (University of Chicago Press, Chicago, IL), pp 22–64.
12. Hall R (1998) In *Biogeography and Geological Evolution of SE Asia*, eds Hall R, Holloway JD (Backhuys Publishers, Leiden, The Netherlands), pp 133–163.
13. Hall R (2002) Cenozoic geological and plate tectonic evolution of SE Asia and the SW Pacific: Computer-based reconstructions, model and animations. *J Asian Earth Sci* 20:353–431.
14. Audley-Charles MG (1991) Tectonics of the New Guinea area. *Annu Rev Earth Planet Sci* 19:17–41.
15. Pagel M, Meade A (2007) BayesTraits version 1.0 <http://www.evolution.rdg.ac.uk/BayesTraits.html>. Accessed January 8, 2011.
16. Pagel M, Meade A, Barker D (2004) Bayesian estimation of ancestral character states on phylogenies. *Syst Biol* 53:673–684.
17. Pagel M (1999) The maximum likelihood approach to reconstructing ancestral character states of discrete characters on phylogenies. *Syst Biol* 48:612–622.
18. Williams PH (1996) *WORLDMAP 4 WINDOWS*: Software and help document 4.1. Privately distributed, London, United Kingdom.
19. Ricklefs RE, Travis J (1980) A morphological approach to the study of avian community organization. *Auk* 97:321–338.

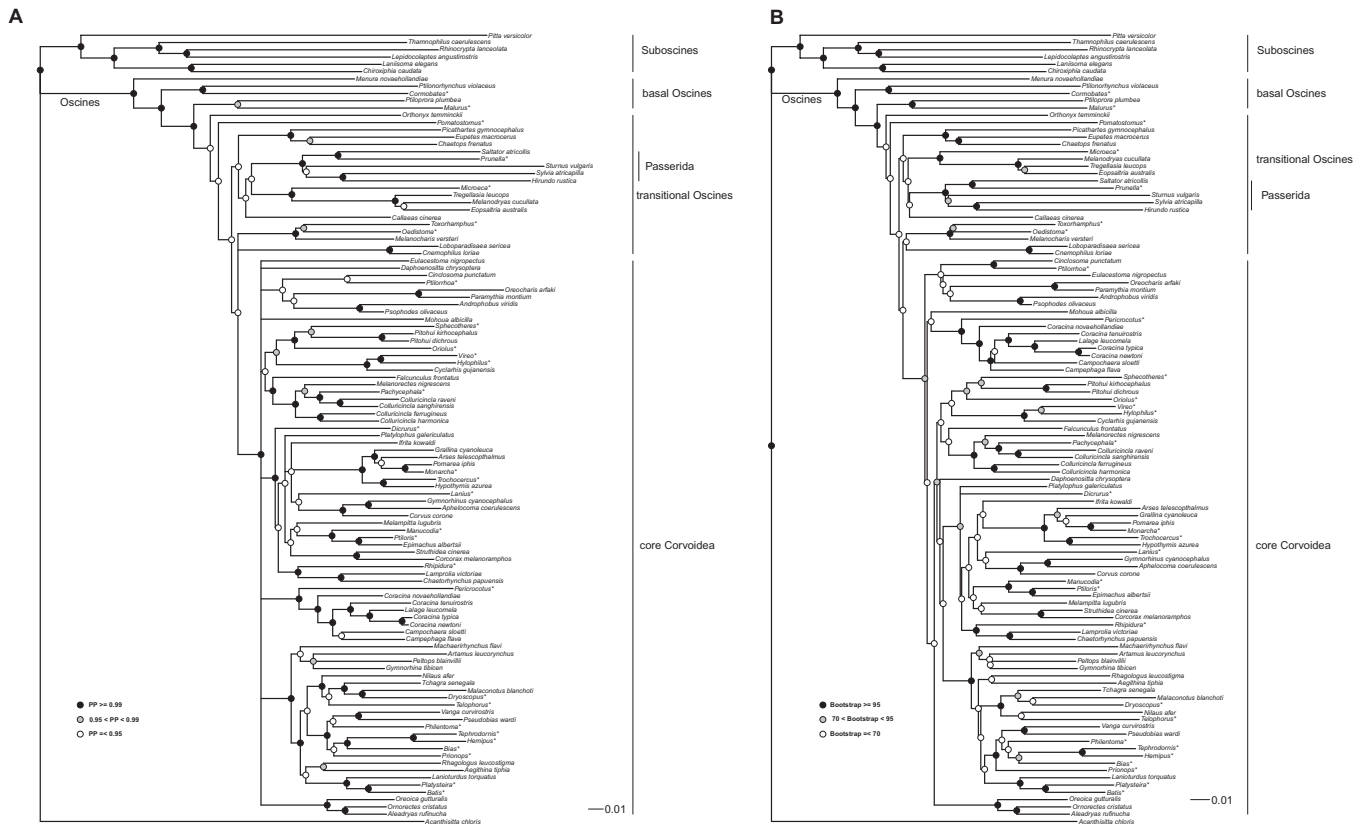

**Fig. S1.** (A) The 50% majority rule consensus tree obtained from the Bayesian analysis of 6,676 bp of the combined dataset (ODC, Myo2, ND2, RAG-1, and RAG-2). BI harmonic mean:  $-\ln 86881.07$ . The substitution model GTR+I+ $\Gamma$  was determined with MrModeltest (1), using the Akaike Information Criterion (2, 3). In the Bayesian analyses (4, 5) the Markov Chain Monte Carlo (MCMC) was run using Metropolis-coupling, with one cold and three heated chains, for 60 million iterations with trees sampled every 500 iterations. The number of iterations discarded before the posterior probabilities were calculated (i.e., the length of the “burn-in” period) was graphically estimated using AWTY (6, 7) by monitoring the change in cumulative split frequencies. Two independent runs initiated from random starting trees were performed, and the log-likelihood values and posterior probabilities for splits and model parameters were checked to ascertain that the chains had reached apparent stationarity. Circles at nodes represent posterior probabilities (PP) (circles: black  $\leq 0.99$ , gray  $0.99 \leq PP \leq 0.95$ , white  $0.95 \leq PP \leq 0$ ). (B) The Maximum Likelihood tree obtained from the RaXML analysis of 6676 bp of the combined dataset (ODC, Myo2, ND2, RAG-1 and RAG-2). Likelihood value  $-\ln 80480.84$ . The substitution model GTR+I+ $\Gamma$  was determined with MrModeltest (1), using the Akaike Information Criterion (2, 3). Circles at nodes represent ML bootstrap support (circles: black 100–95%, gray 95–70%, white 70–0%). The 50% majority rule consensus trees obtained from the Bayesian analysis of the full data for each of these markers is available from K.A.J.

- Nylander JAA (2004) MrModeltest v2. Program distributed by the author. Evolutionary Biology Centre, Uppsala University. Available from: <http://www.abc.se/~nylander>. Accessed January 8, 2011.
- Akaike H (1973) Information theory as an extension of the maximum likelihood principle. In: Petrov BN, Csaki F, eds. Second International Symposium on Information Theory (Tshakdador, Armenia, USSR, September 2–8, 1971). Akademiai Kiado, Budapest. pp. 276–281.
- Posada D, Buckley TR (2004) Model selection and model averaging in phylogenetics: Advantages of akaike information criterion and bayesian approaches over likelihood ratio tests. *Syst Biol* 53:793–808.
- Ronquist F, Huelsenbeck JP (2003) MrBayes 3: Bayesian phylogenetic inference under mixed models. *Bioinformatics* 19:1572–1574.
- Nylander JAA, Ronquist F, Huelsenbeck JP, Nieves-Aldrey JL (2004) Bayesian phylogenetic analysis of combined data. *Syst Biol* 53:47–67.
- Nylander JAA, Wilgenbusch JC, Warren DL, Swofford DL (2008) AWTY (are we there yet?): A system for graphical exploration of MCMC convergence in Bayesian phylogenetics. *Bioinformatics* 24:581–583.
- Wilgenbusch JC, Warren DL, Swofford DL (2004) AWTY: A system for graphical exploration of MCMC convergence in Bayesian phylogenetic inference. Available at <http://ceb.csit.fsu.edu/awty>. Accessed January 8, 2011.

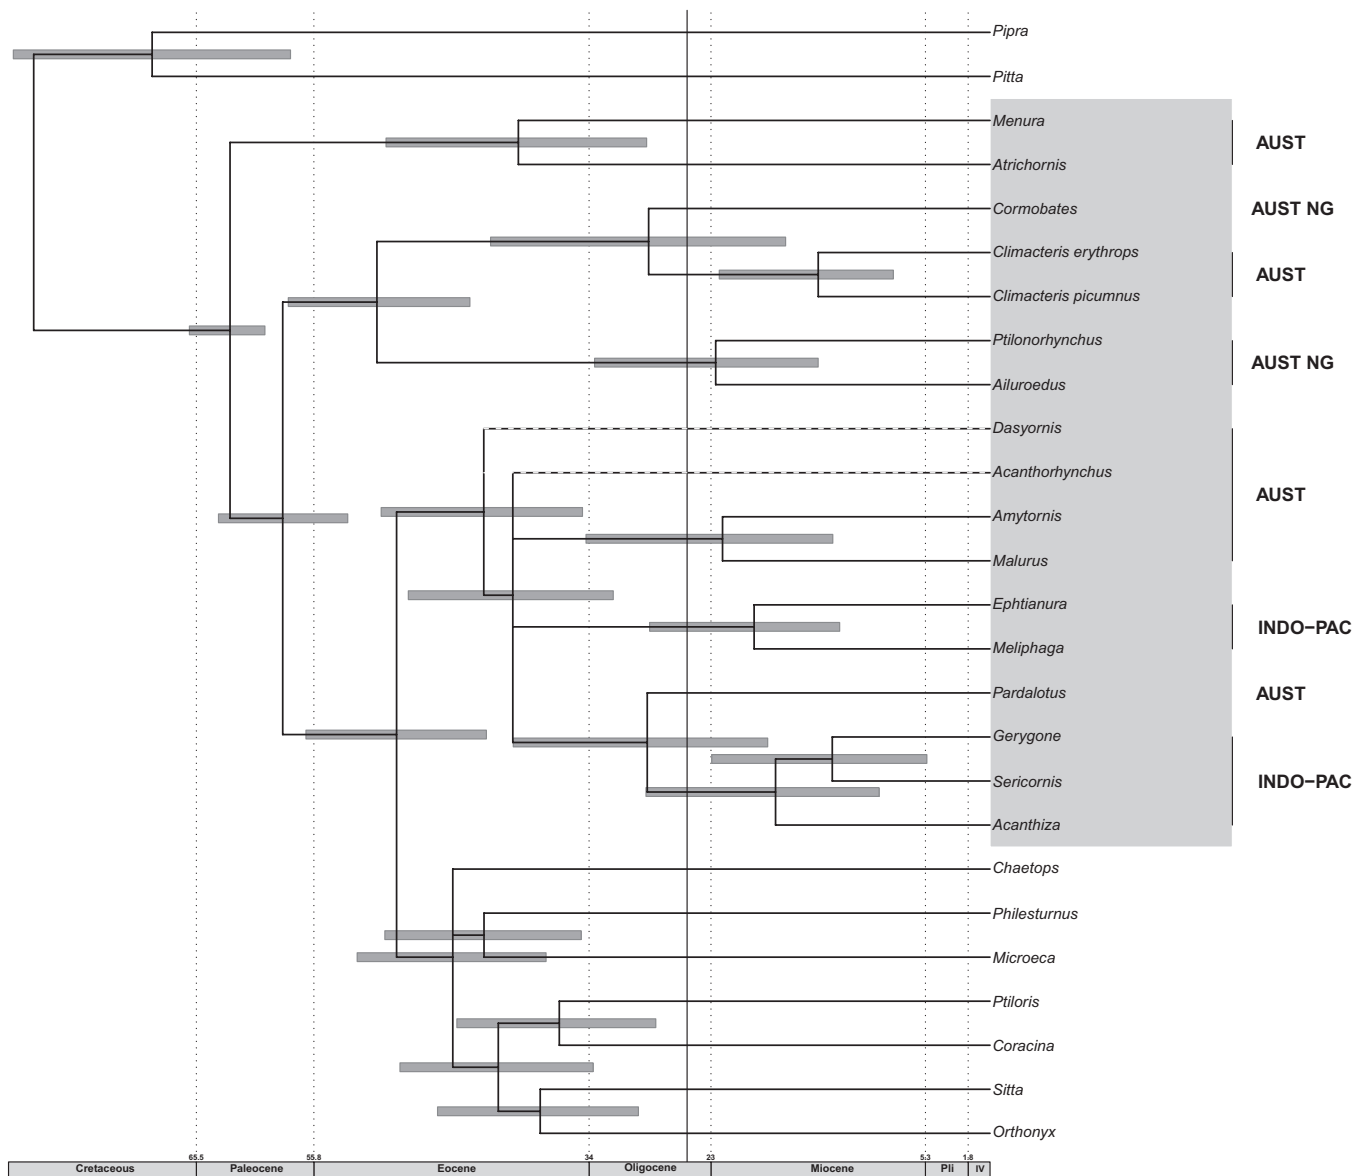

**Fig. S2.** Chronogram for the basal oscine lineages. Basal oscine lineages are shaded gray. Bayesian analysis was performed on 2,872 bp of the Recombination Activating Gene 1 (RAG-1). BI harmonic mean  $-\ln 11500.49$ . The substitution model GTR+I+ $\Gamma$  was determined with MrMODELTEST (1), using the Akaike Information Criterion (2, 3). In the Bayesian analyses (4, 5) the MCMC was run using Metropolis-coupling, with one cold and three heated chains, for 20 million iterations with trees sampled every 500 iterations. The number of iterations discarded before the posterior probabilities were calculated (i.e., the length of the “burn-in” period) was graphically estimated using AWTY (6, 7) by monitoring the change in cumulative split frequencies. Two independent runs initiated from random starting trees were performed, and the log-likelihood values and posterior probabilities for splits and model parameters were checked to ascertain that the chains had reached apparent stationarity. Divergence times were estimated from the RAG1 dataset with a Bayesian relaxed molecular clock method (8, 9). Two genera for which we did not have RAG-1 available were added to the basal oscine chronogram (with dashed lines) because other studies have demonstrated that they represent deep branches in the tree.

- Nylander JAA (2004) MrModeltest v2. Program distributed by the author. Evolutionary Biology Centre, Uppsala University. Available from: <http://www.abc.se/~nylander>. Accessed January 8, 2011.
- Akaike H (1973) Information theory as an extension of the maximum likelihood principle. In: Petrov BN, Csaki F, eds. Second International Symposium on Information Theory. Akademiai Kiado, Budapest. pp. 276–281.
- Posada D, Buckley TR (2004) Model selection and model averaging in phylogenetics: Advantages of akaike information criterion and bayesian approaches over likelihood ratio tests. *Syst Biol* 53:793–808.
- Ronquist F, Huelsenbeck JP (2003) MrBayes 3: Bayesian phylogenetic inference under mixed models. *Bioinformatics* 19:1572–1574.
- Nylander JAA, Ronquist F, Huelsenbeck JP, Nieves-Aldrey JL (2004) Bayesian phylogenetic analysis of combined data. *Syst Biol* 53:47–67.
- Nylander JAA, Wilgenbusch JC, Warren DL, Swofford DL (2008) AWTY (are we there yet?): A system for graphical exploration of MCMC convergence in Bayesian phylogenetics. *Bioinformatics* 24:581–583.
- Wilgenbusch JC, Warren DL, Swofford DL (2004) AWTY: A system for graphical exploration of MCMC convergence in Bayesian phylogenetic inference. Available at <http://ceb.csit.fsu.edu/awty>. Accessed January 8, 2011.
- Kishino H, Thorne JL, Bruno WJ (2001) Performance of a divergence time estimation method under a probabilistic model of rate evolution. *Mol Biol Evol* 18:352–361.
- Thorne JL, Kishino H (2002) Divergence time and evolutionary rate estimation with multilocus data. *Syst Biol* 51:689–702.

**Table S1. Results of the BayesTraits analysis**

| Hypothesis               | Likelihood value | Harmonic mean | Bayes factor against Hypothesis 3 |
|--------------------------|------------------|---------------|-----------------------------------|
| 1: New Zealand           | -164.18          | -172.17       | 6.48**                            |
| 2: Australia             | -162.23          | -170.29       | 2.73*                             |
| 3: New Guinea            | -155.88          | -168.93       | 0                                 |
| 4: Philippines           | -160.11          | -172.57       | 7.29**                            |
| 5: Wallacea              | -170.12          | -174.25       | 10.65***                          |
| 6: Eurasia               | -160.65          | -170.3        | 2.76*                             |
| 7: Africa                | -164.76          | -170.76       | 3.66*                             |
| 8: America               | -159.28          | -171.91       | 5.96**                            |
| 9: Pacific islands       | -159.71          | -173.05       | 8.25**                            |
| 10: Indian ocean islands | -161.08          | -170.43       | 3.01*                             |

Ancestral area state reconstructions at the most recent common ancestor of the core Corvoidea clade. Bayes Factors (BF) measure twice the difference between the harmonic mean (HM) returned by the model when the Most Recent Common Ancestor is successively set at its 10 possible biogeographic states (New Guinea, New Zealand, Australia, Philippines, Wallacea, Asia, Africa, America, Pacific Ocean islands, and Indian Ocean islands), with a difference of 2 to 5 considered as positive evidence (\*), 5 to 10 considered strong evidence (\*\*), and >10 very strong evidence (\*\*\*) (1). The harmonic mean (-168.9) of the constrained ancestral biogeographic state reconstruction was significantly higher for the New Guinea hypothesis than for the other nine biogeographic states. Furthermore, the state returning the highest marginal likelihood value is New Guinea (155.88).

1. Pagel M, Meade A, Barker D (2004) Bayesian estimation of ancestral character states on phylogenies. *Syst Biol* 53:673–684.

Table S2. Specimen data: core Corvoidea and transitional oscine lineages at 25 Mya

| Lineages       | Species                                     | Myo      | ODC      | ND2      | RAG1      | RAG2      | References   |
|----------------|---------------------------------------------|----------|----------|----------|-----------|-----------|--------------|
| core Corvoidea |                                             |          |          |          |           |           |              |
| 1              | <i>Aleadryas rufinucha</i>                  | EU273395 | EU273355 | EF592289 | FJ821040  | /         | 1, 2         |
|                | <i>Oreoica gutturalis</i>                   | FJ821094 | /        | EF592284 | AY443307  | AY443183  | 1, 3, 4      |
|                | <i>Ornorectes cristatus</i>                 | EU273411 | EU273370 | GQ494087 | AY443318  | AY443205  | 2, 3, 5      |
| 2              | <i>Batis poensis/mixta*</i>                 | AY529907 | EU272120 | AY529941 | AY443263* | AY443110* | 3, 6         |
|                | <i>Laniorturdus torquatus</i>               | AY529924 | /        | AY529959 | AY799819  | AY799838  | 6, 7         |
|                | <i>Platysteira chalybeal/castanea*</i>      | AY529919 | /        | AY529954 | DQ376531* | DQ376521* | 6, 8         |
| 3              | <i>Bias flammulatus/musicus*</i>            | AY529927 | /        | AY529962 | DQ376529* | DQ376519* | 6, 8         |
|                | <i>Hemipus picatus/hirundinaceus*</i>       | DQ406637 | /        | DQ411309 | DQ376527* | DQ376517* | 8, 9         |
|                | <i>Prionops retzii/plumatus*</i>            | AY529931 | EU380457 | AY529966 | AY443322* | AY443211* | 3, 6, 10     |
|                | <i>Tephrodornis pondicerianus/gularis*</i>  | EF052762 | /        | EF052689 | DQ376526* | DQ376516* | 8, 11        |
| 4              | <i>Philentoma velatal/pyrhopterum*</i>      | AY816221 | /        | AY816228 | DQ376525* | DQ376515  | 8, 9         |
|                | <i>Pseudobias wardi</i>                     | AY529933 | /        | AY529968 | DQ376530  | DQ376520  | 6, 8         |
|                | <i>Vanga curvirostris</i>                   | AY701505 | /        | AY701508 | AY057040  | AY443244  | 3, 12, 13    |
| 5              | <i>Dryoscopus gambensis/cubla*</i>          | AY529918 | /        | AY529953 | AY443284* | AY443142* | 3, 6         |
|                | <i>Malaconotus blanchoti</i>                | AY529926 | /        | AY529961 | /         | /         | 6            |
|                | <i>Tchagra senegalus</i>                    | AY529937 | /        | AY529972 | DQ376528  | DQ376518  | 6, 8         |
|                | <i>Telophorus sulfureopectus/dohertyi*</i>  | AY529912 | EU380413 | AY529947 | AY443336* | AY443234* | 3, 6, 10     |
| 6              | <i>Nilaus afer</i>                          | AY529928 | /        | AY529963 | /         | /         | 6            |
| 7              | <i>Aegithina tiphia</i>                     | AY816225 | /        | AY816232 | AY056977  | AY443104  | 3, 9, 12     |
|                | <i>Rhagologus leucostigma</i>               | EU273416 | /        | EF592323 | FJ821071  | /         | 1, 2         |
| 8              | <i>Artamus leucorynchus</i>                 | FJ821079 | /        | DQ096729 | AY056980  | AY443109  | 14           |
|                | <i>Gymnorhina tibicen</i>                   | AY064741 | EU272119 | AY064756 | FJ358100  | AY443153  | 3, 15, 16    |
|                | <i>Peltops blainvillii</i>                  | FJ821099 | /        | /        | FJ821065  | /         | 4            |
| 9              | <i>Machaerirhynchus flaviventer</i>         | FJ821090 | /        | DQ084072 | FJ821057  | /         | 1, 4         |
| 10             | <i>Campephaga flava</i>                     | EF052822 | EU380410 | AY529944 | AF295184  | /         | 11, 17       |
|                | <i>Campochaera sloetii</i>                  | EU380489 | EU380412 | HM002951 | /         | /         | 2, 18        |
|                | <i>Coracina newtoni</i>                     | HM002941 | HM003014 | HM002973 | /         | /         | 18           |
|                | <i>Coracina novaehollandiae</i>             | EF052834 | EU380425 | EF052779 | AY443272  | AY443128  | 3, 10, 11    |
|                | <i>Coracina tenuirostris</i>                | HM002945 | HM003019 | HM002987 | /         | /         | 18           |
|                | <i>Coracina typica</i>                      | HM002946 | HM003020 | HM002988 | /         | /         | 18           |
|                | <i>Lalage leucomela</i>                     | EF052840 | EU380438 | EF052785 | AY443292  | AY443159  | 3, 10, 11    |
| 11             | <i>Pericrocotus divaricatus/lethologus*</i> | EU380514 | EU380449 | GQ255857 | AY443316* | AY443200* | 2, 3, 19     |
| 12             | <i>Chaetorhynchus papuensis</i>             | EU726214 | EU726224 | /        | AY443267  | AY443117  | 3, 20        |
|                | <i>Lamprolia victoriae</i>                  | EU726215 | EU726225 | /        | /         | /         | 20           |
| 13             | <i>Rhipidura rufifrons/hyperthra*</i>       | DQ084100 | EU272115 | DQ084073 | AY443329* | AY443223* | 3, 14, 21    |
| 14             | <i>Corcorax melanoramphos</i>               | AY064737 | EF441236 | AY064747 | AY443273  | AY443129  | 15, 16       |
|                | <i>Struthidea cinerea</i>                   | AY064738 | /        | AY064757 | AY443335  | AY443231  | 3, 15        |
| 15             | <i>Epimachus albertisi</i>                  | AY064735 | EU380436 | AY064745 | AY037850  | /         | 10, 15       |
|                | <i>Manucodia ater</i>                       | EU726218 | EU726228 | /        | AY443295  | AY443163  | 20           |
|                | <i>Ptiloris magnificus</i>                  | EU726219 | EU726229 | AY064761 | AY443325  | AY443217  | 3, 15, 20    |
| 16             | <i>Melampitta lugubris</i>                  | EU726213 | EU726221 | EF592281 | AY443298  | AY443166  | 1, 3, 20     |
| 17             | <i>Aphelocoma coerulescens</i>              | AY395580 | /        | DQ912601 | /         | /         | 22, 23       |
|                | <i>Corvus corone</i>                        | AY529914 | EU272116 | AY529949 | AY056989  | AY443132  | 3, 6, 21     |
|                | <i>Gymnorhinus cyanocephalus</i>            | AY395589 | /        | DQ912615 | /         | /         | 22, 23       |
| 18             | <i>Lanius collurio/excubitor*</i>           | EF635052 | EF637073 | EU166959 | AY228042  | AY443160* | 3, 24, 25    |
| 19             | <i>Arses telescopthalmus</i>                | DQ084104 | /        | DQ084077 | /         | /         | 14           |
|                | <i>Grallina cyanoleuca</i>                  | DQ084101 | /        | DQ084074 | AY443288  | AY443152  | 3, 14        |
|                | <i>Hypothymis azurea</i>                    | EF052768 | EU726223 | EF052695 | /         | /         | 11, 20       |
|                | <i>Monarcha melanopsis/laxillaris*</i>      | DQ084110 | EU272114 | DQ084083 | FJ821059  | AY443176* | 3, 4, 14, 21 |
|                | <i>Pomarea iphis</i>                        | DQ084119 | /        | DQ084097 | /         | /         | 14           |
|                | <i>Trochocercus nitens</i>                  | /        | /        | EU652702 | /         | /         | 26           |
| 20             | <i>Ifrita kowaldi</i>                       | EU273402 | /        | EF592280 | FJ821054  | /         | 1, 2         |
| 21             | <i>Platylophus galericulatus</i>            | EU380517 | EU380456 | /        | /         | /         | 10           |
| 22             | <i>Dicrurus bracteatus/ladsmilis*</i>       | EF052839 | EU272113 | EF052784 | FJ821049  | AY443140* | 3, 4, 11, 21 |
| 23             | <i>Eulacestoma nigropectus</i>              | EU273400 | /        | EF592278 | FJ821051  | /         | 1, 2, 4      |
| 24             | <i>Colluricincla ferrugineus</i>            | EU273413 | EU273372 | GQ494089 | /         | /         | 2, 5         |
|                | <i>Colluricincla harmonica</i>              | EU273396 | EU273356 | GQ494091 | AY443270  | AY443124  | 2, 5         |
|                | <i>Coracornis raveni</i>                    | EU380503 | EU380434 | GQ494106 | /         | /         | 5, 10        |
|                | <i>Coracornis sanghirensis</i>              | EF441256 | EF441235 | GQ494110 | /         | /         | 5, 10        |
|                | <i>Melanorectes nigrescens</i>              | EU273415 | EU273373 | GQ494090 | /         | /         | 2            |
|                | <i>Pachycephala pectoralis/hyperthra*</i>   | EU273407 | EU273366 | EU600813 | AY443310* | AY443188* | 2, 3, 27     |
| 25             | <i>Falcunculus frontatus</i>                | FJ821086 | /        | EF592279 | AY443287  | AY443146  | 1, 3, 4      |

Table S2. Cont.

| Lineages                  | Species                                       | Myo      | ODC      | ND2       | RAG1      | RAG2      | References           |
|---------------------------|-----------------------------------------------|----------|----------|-----------|-----------|-----------|----------------------|
| 26                        | <i>Cyclarhis gujanensis</i>                   | EU380504 | EU380435 | AY030129  | /         | /         | 10, 28               |
|                           | <i>Hylophilus ochraceiceps/poicilotis*</i>    | EU272100 | EU272109 | AY030133  | AY443291* | AY443156* | 3, 10, 28            |
|                           | <i>Vireo olivaceus/philadelphia*</i>          | EU272101 | EU272110 | AY136614  | AY057041* | AY443245* | 12, 21, 29           |
| 27                        | <i>Oriolus flavocinctus/xanthonotus*</i>      | EF441258 | EF441243 | GQ901758  | AY443308* | AY443185* | 3, 16, 30            |
| 28                        | <i>Pitohui dichrous</i>                       | EU273412 | EU273371 | GQ494088  | /         | /         | 2, 5                 |
|                           | <i>Pitohui kirhocephalus</i>                  | EU273414 | /        | EF592318  | /         | /         | 1, 2                 |
| 29                        | <i>Sphecotheres vieillotii/iridis*</i>        | FJ821107 | GQ901707 | GQ901761  | AY443333* | AY443229* | 3, 4, 30             |
| 30                        | <i>Mohoua albicilla</i>                       | FJ821091 | /        | /         | FJ821058  | /         | 4                    |
| 31                        | <i>Androphobus viridis</i>                    | /        | HQ456529 | /         | /         | /         | Present study        |
|                           | <i>Psophodes olivaceus</i>                    | FJ821102 | /        | EF592322  | FJ821069  | /         | 1, 4                 |
| 32                        | <i>Oreocharis arfaki</i>                      | HQ456526 | HQ456530 | /         | /         | /         | Present study        |
|                           | <i>Paramythia montium</i>                     | HQ456527 | HQ456531 | /         | AY443312  | AY443192  | 3, present study     |
| 33                        | <i>Cinclosoma punctatum</i>                   | FJ821080 | /        | /         | FJ821043  | /         | 4                    |
|                           | <i>Ptilorrhoa leucosticta/caerulescens*</i>   | EF441261 | EF441255 | /         | AY443326* | AY443218* | 3, 16                |
| 34                        | <i>Daphoenositta chrysoptera</i>              | EU380505 | /        | /         | AY443281  | AY443138  | 3, 10                |
| Transitional oscines      |                                               |          |          |           |           |           |                      |
| 1                         | <i>Cnemophilus lorae</i>                      | EU272107 | EU272126 | /         | AY443269  | /         | 3, 21                |
|                           | <i>Loboparadisaea sericea</i>                 | EU272106 | EU272125 | /         | AY443294  | AY443161  | 3, 21                |
| 2                         | <i>Melanocharis versteri</i>                  | EU272103 | EU272121 | /         | AY443299  | AY443168  | 3, 21                |
| 3                         | <i>Oedistoma pygmaeum/liliolophum*</i>        | EU272104 | EU272122 | /         | AY057010* | AY443182* | 3, 12, 21            |
| 4                         | <i>Toxorhamphus poliopterus/novaeguineae*</i> | EU272105 | EU272123 | /         | AY057036* | AY443238* | 3, 12, 21            |
| 5                         | <i>Callaesa cinerea</i>                       | EU272108 | EU272124 | /         | DQ469294  | /         | 21, 31, 32           |
| 6                         | <i>Eopsaltria australis</i>                   | AY064732 | EF441238 | AY064749  | AY064262  | /         | 15, 16               |
|                           | <i>Melanodryas cucullata</i>                  | HQ612121 | HQ612165 | EF592282  | AY443300  | AY443169  | 1, 3, present study  |
|                           | <i>Tregellasia leucops</i>                    | HQ612130 | HQ612174 | HQ456528  | AY057037  | AY443239  | 3, 12, present study |
| 7                         | <i>Microeca fascians/papuana*</i>             | HQ612122 | HQ612166 | EF592283  | AY443301* | AY443172* | 1, 3, present study  |
| 8                         | <i>Chaetops frenatus</i>                      | AY228289 | EF441234 | /         | AY443266  | AY443116  | 3, 33                |
| 9                         | <i>Eupetes macrocerus</i>                     | EF441257 | EF441239 | /         | /         | /         | 16                   |
| 10                        | <i>Picathartes gymnocephalus</i>              | AY228314 | EF441247 | DQ125989  | AY057019  | AY443203  | 3, 16, 33, 34        |
| 11                        | <i>Orthonyx temminckii</i>                    | AY064728 | EF441244 | AY064755  | AY443309  | AY443187  | 3, 15, 16            |
| 12                        | <i>Pomatostomus temporalis/halli*</i>         | AY064730 | EF441248 | AY064758  | AY443321* | AY443209* | 3, 15, 16            |
| Passerida                 |                                               |          |          |           |           |           |                      |
|                           | <i>Hirundo rustica</i>                        | AY064258 | EF441240 | DQ176584  | AY443290  | AY443155  | 3, 15, 16, 35        |
|                           | <i>Prunella modularis/collaris*</i>           | AY228318 | EF441249 | AF407038  | AY057024* | AY443213* | 3, 16, 33, 36        |
|                           | <i>Saltator atricollis</i>                    | AY228320 | EF441252 | EF529914  | AY228036  | /         | 16, 33, 37           |
|                           | <i>Sturnus vulgaris</i>                       | AY228322 | EF441253 | FJ177342  | AY057032  | AY443232  | 3, 12, 16, 33, 38    |
|                           | <i>Sylvia atricapilla</i>                     | AY228323 | EF441254 | DQ125994  | EF568261  | EF568285  | 16, 33, 34, 39       |
| Basal oscines             |                                               |          |          |           |           |           |                      |
| Family: Climacteridae     |                                               |          |          |           |           |           |                      |
|                           | <i>Cormobates placens/leucophaeus*</i>        | AY064731 | EF441237 | AY064748  | AY064260  | AY443130* | 3, 15, 16            |
| Family: Maluridae         |                                               |          |          |           |           |           |                      |
|                           | <i>Malurus amabilis/melanocephalus*</i>       | AY064729 | EF441241 | AY064752  | AY037847  | AY443162* | 3, 15, 16            |
| Family: Menuridae         |                                               |          |          |           |           |           |                      |
|                           | <i>Menura novaehollandiae</i>                 | AY064744 | EF441242 | NC_007883 | AY057004  | AY443171  | 3, 12, 15, 16, 40    |
| Family: Ptilonorhynchidae |                                               |          |          |           |           |           |                      |
|                           | <i>Ptilonorhynchus violaceus</i>              | AY064742 | EF441250 | AY064759  | AY057026  | AY443216  | 3, 12, 15, 16        |
| Family: Meliphagidae      |                                               |          |          |           |           |           |                      |
|                           | <i>Ptiloprora plumbea</i>                     | AY064736 | EF441251 | AY064760  | AY037848  | /         | 15, 16               |
| Suboscines                |                                               |          |          |           |           |           |                      |
|                           | <i>Chiroxiphia caudata</i>                    | DQ435516 | DQ435477 | AY136620  | AF453802  | FJ501792  | 41–44                |
|                           | <i>Laniisoma elegans</i>                      | EU231747 | EU231848 | DQ363975  | FJ501651  | FJ501831  | 44–46                |
|                           | <i>Lepidocolaptes angustirostris</i>          | AY065767 | DQ435486 | AY089838  | FJ461168  | FJ460984  | 43, 47–49            |
|                           | <i>Pitta versicolor</i>                       | DQ786002 | DQ785966 | EF501927  | DQ320617  | DQ320581  | 50–52                |
|                           | <i>Rhinocrypta lanceolata</i>                 | AY065775 | DQ435499 | AY370596  | FJ461221  | FJ460995  | 43, 48, 49, 53       |
|                           | <i>Thamnophilus caerulescens</i>              | AY065783 | DQ435504 | EF030294  | FJ461176  | FJ461066  | 43, 48, 49, 54       |
| Acanthisittidae           |                                               |          |          |           |           |           |                      |
|                           | <i>Acanthisitta chloris</i>                   | EU272612 | EU272620 | AY325307  | AY056975  | AY443102  | 3, 12, 20            |

List of taxa with GenBank accession numbers that were used for the main analyses in the present study. References are given to the studies for which the sequences were originally generated.

\*Taxa for which two species from the same genus were used in the analyses.

- Dumbacher JP, Deiner K, Thompson L, Fleischer RC (2008) Phylogeny of the avian genus *Pitohui* and the evolution of toxicity in birds. *Mol Phylogenet Evol* 49:774–781.
- Jönsson KA, Bowie RCK, Norman JA, Christidis L, Fjeldså J (2008a) Polyphyletic origin of toxic Pitohui birds suggests widespread occurrence of toxicity in corvid birds. *Biol Lett* 4:71–74.
- Barker FK, Cibois A, Schikler P, Feinstein J, Cracraft J (2004) Phylogeny and diversification of the largest avian radiation. *Proc Natl Acad Sci USA* 101:11040–11045.

4. Norman JA, Ericson PGP, Jönsson KA, Fjeldså J, Christidis L (2009) A multi-gene phylogeny reveals novel relationships for aberrant genera of Australo-Papuan core Corvoidea and polyphyly of the Pachycephalidae and Psophodidae (Aves: Passeriformes). *Mol Phylogenet Evol* 52:488–497.
5. Jönsson KA, et al. (2010b) Historical biogeography of an Indo-Pacific passerine bird family (Pachycephalidae): Different colonization patterns in the Indonesian and Melanesian archipelagos. *J Biogeogr* 37:245–257.
6. Fuchs J, Bowie RCK, Fjeldså J, Pasquet E (2004) Phylogenetic relationships of the African bush-shrikes and helmet-shrikes (Passeriformes: Malaconotidae). *Mol Phylogenet Evol* 33: 428–439.
7. Beresford P, Barker FK, Ryan PG, Crowe TM (2005) African endemics span the tree of songbirds (Passeri): molecular systematics of several evolutionary ‘enigmas’. *Proc Biol Sci* 272: 849–858.
8. Moyle RG, Cracraft J, Lakim M, Nais J, Sheldon FH (2006a) Reconsideration of the phylogenetic relationships of the enigmatic Bornean Bristlehead (*Pityriasis gymnocephala*). *Mol Phylogenet Evol* 39:893–898.
9. Fuchs J, Fjeldså J, Pasquet E (2006a) An ancient African radiation of corvid birds (Aves: Passeriformes) detected by mitochondrial and nuclear sequence data. *Zool Scr* 35:375–385.
10. Jönsson KA, et al. (2008b) Explosive avian radiations and multi-directional dispersal across Wallacea: Evidence from the Campephagidae and other Crown Corvida (Aves). *Mol Phylogenet Evol* 47:221–236.
11. Fuchs J, Cruaud C, Couloux A, Pasquet E (2007) Complex biogeographic history of the cuckoo-shrikes and allies (Passeriformes: Campephagidae) revealed by mitochondrial and nuclear sequence data. *Mol Phylogenet Evol* 44:138–153.
12. Barker FK, Barrowclough GF, Groth JG (2002) A phylogenetic hypothesis for passerine birds: Taxonomic and biogeographic implications of an analysis of nuclear DNA sequence data. *Proc Biol Sci* 269:295–308.
13. Fuchs J, Fjeldså J, Pasquet E (2005) The use of mitochondrial and nuclear data in assessing the taxonomic status of the Endangered Uluguru Bush-Shrike (*Malaconotus alius*). *Ibis* 147: 717–724.
14. Filardi CE, Moyle RG (2005) Single origin of a pan-Pacific bird group and upstream colonization of Australasia. *Nature* 438:216–219.
15. Ericson PG, Christidis L, Irestedt M, Norman JA (2002) Systematic affinities of the lyrebirds (Passeriformes: *Menura*), with a novel classification of the major groups of passerine birds. *Mol Phylogenet Evol* 25:53–62.
16. Jönsson KA, Fjeldså J, Ericson PGP, Irestedt M (2007) Systematic placement of an enigmatic Southeast Asian taxon *Eupetes macrocerus* and implications for the biogeography of a main songbird radiation, the Passerida. *Biol Lett* 3:323–326.
17. Irestedt M, Johansson US, Parsons TJ, Ericson PGP (2001) Phylogeny of major lineages of suboscines (Passeriformes) analyzed by nuclear DNA sequence data. *J Avian Biol* 32:15–25.
18. Jönsson KA, et al. (2010a) Biogeographical history of cuckoo-shrikes (Aves: Passeriformes): Transoceanic colonization of Africa from Australo-Papua. *J Biogeogr* 37:1767–1781.
19. Jönsson KA, Irestedt M, Ericson PGP, Fjeldså J (2010d) A molecular phylogeny of minivets (Passeriformes: Campephagidae: *Pericrocotus*): implications for biogeography and convergent plumage evolution. *Zool Scr* 39:1–8.
20. Irestedt M, et al. (2008) The systematic affinity of the enigmatic *Lamprolia victoriana* (Aves: Passeriformes)—An example of avian dispersal between New Guinea and Fiji over Miocene intermittent land bridges? *Mol Phylogenet Evol* 48:1218–1222.
21. Irestedt M, Ohlson JI (2008) The division of the major songbird radiation into Passerida and core Corvoidea (Aves: Passeriformes)—The species tree vs. gene trees. *Zool Scr* 37:305–313.
22. Ericson PGP, Jansen A-L, Johansson US, Ekman J (2005) Inter-generic relationships of the crows, jays, magpies and allied groups (Aves: Corvidae) based on nucleotide sequence data. *J Avian Biol* 36:222–234.
23. Bonaccorso E, Peterson AT (2007) A multilocus phylogeny of New World jay genera. *Mol Phylogenet Evol* 42:467–476.
24. Brown JW, Rest JS, García-Moreno J, Sorenson MD, Mindell DP (2008) Strong mitochondrial DNA support for a Cretaceous origin of modern avian lineages. *BMC Biol* 6:6.
25. Gonzalez JE, Wink M, Garcia-del-Rey E, Delgado G (2008) Evidence from DNA nucleotide sequences and ISSR fingerprints supports paraphyly in Southern Great Shrike (*Lanius meridionalis*). *J Ornithol* 149:495–506.
26. Nguembock B, Fjeldså J, Cruaud C, Pasquet E (2008) Molecular phylogenetic analysis of all members of the genus *Elminia* confirms their presence within the Stenostiridae clade. *Zool Scr* 37:591–602.
27. Jönsson KA, et al. (2008c) Molecular phylogenetics and diversification within one of the most geographically variable bird species complexes *Pachycephala pectoralis/melanura*. *J Avian Biol* 39:473–478.
28. Cicero C, Johnson NK (2001) Higher-level phylogeny of new world vireos (Aves: Vireonidae) based on sequences of multiple mitochondrial DNA genes. *Mol Phylogenet Evol* 20:27–40.
29. Sefc KM, Payne RB, Sorenson MD (2003) Phylogenetic relationships of African sunbird-like warblers: Moho (*Hypergerus atriceps*), Green Hylia (*Hylia prasina*) and Tit-Hylia (Pholidornis rufipectus). *Ostrich* 74:8–17.
30. Jönsson KA, et al. (2010c) Phylogeny and biogeography of Oriolidae (Aves: Passeriformes). *Ecography* 33:1–10.
31. Ewen JG, Flux I, Ericson PGP (2006) Systematic affinities of two enigmatic New Zealand passerines of high conservation priority, the hihi or stitchbird *Notiomystis cincta* and the kokako *Callaeas cinerea*. *Mol Phylogenet Evol* 40:281–284.
32. Shepherd LD, Lambert DM (2007) The relationships and origins of the New Zealand wattlebirds (Passeriformes, Callaeatidae) from DNA sequence analyses. *Mol Phylogenet Evol* 43: 480–492.
33. Ericson PG, Johansson US (2003) Phylogeny of Passerida (Aves: Passeriformes) based on nuclear and mitochondrial sequence data. *Mol Phylogenet Evol* 29:126–138.
34. Fuchs J, Fjeldså J, Bowie RCK, Voelker G, Pasquet E (2006b) The African warbler genus *Hylota* as a lost lineage in the Oscine songbird tree: Molecular support for an African origin of the Passerida. *Mol Phylogenet Evol* 39:186–197.
35. Zink RM, Pavlova A, Rohwer S, Drovetski SV (2006) Barn swallows before barns: Population histories and intercontinental colonization. *Proc Biol Sci* 273:1245–1251.
36. Sorenson MD, Payne RB (2001) A single ancient origin of brood parasitism in African finches: Implications for host-parasite coevolution. *Evolution* 55:2550–2567.
37. Klicka J, Burns K, Spellman GM (2007) Defining a monophyletic Cardinalini: A molecular perspective. *Mol Phylogenet Evol* 45:1014–1032.
38. Spellman GM, Cibois A, Moyle RG, Winker K, Keith Barker F (2008) Clarifying the systematics of an enigmatic avian lineage: What is a bombycillid? *Mol Phylogenet Evol* 49:1036–1040.
39. Treplin S, et al. (2008) Molecular phylogeny of songbirds (Aves: Passeriformes) and the relative utility of common nuclear marker loci. *Cladistics* 24:328–349.
40. Slack KE, Delsuc F, McLennan PA, Arnason U, Penny D (2007) Resolving the root of the avian mitogenomic tree by breaking up long branches. *Mol Phylogenet Evol* 42:1–13.
41. Marini MA, Hackett SJ (2002) A multifaceted approach to the characterization of an intergeneric hybrid manakin (Pipridae) from Brazil. *Auk* 119:1114–1120.
42. Johansson US, Irestedt M, Parsons TJ, Ericson PGP (2002) Basal phylogeny of the tyrannoidea based on comparisons of cytochrome b and exons of nuclear c-myc and RAG-1 genes. *Auk* 119:984–995.
43. Ericson PG, et al. (2006) Higher-level phylogeny and morphological evolution of tyrant flycatchers, cotingas, manakins, and their allies (Aves: Tyrannida). *Mol Phylogenet Evol* 40: 471–483.
44. Tello JG, Moyle RG, Marchese DJ, Cracraft J (2009) Phylogeny and phylogenetic classification of the tyrant flycatchers, cotingas, manakins, and their allies (Aves: Tyrannidae). *Cladistics* 25:429–467.
45. Barber BR, Rice NH (2007) Systematics and evolution in the Tityrinae (Passeriformes: Tyrannoidea). *Auk* 124:1317–1329.
46. Ohlson JI, Fjeldså J, Ericson PGP (2008) Tyrant flycatchers coming out in the open: Phylogeny and ecological radiation of Tyrannidae (Aves, Passeriformes). *Zool Scr* 37:315–335.
47. Aleixo A (2002) Molecular systematics and the role of the ‘Varzea’-‘Terra-firme’ ecotone in the diversification of *Xiphorhynchus* woodcreepers (Aves: Dendrocolaptidae). *Auk* 119: 621–640.
48. Irestedt M, Fjeldså J, Johansson US, Ericson PGP (2002) Systematic relationships and biogeography of the tracheophone suboscines (Aves: Passeriformes). *Mol Phylogenet Evol* 23: 499–512.
49. Moyle RG, et al. (2009) Phylogeny and phylogenetic classification of the antbirds, ovenbirds, woodcreepers and allies (Aves: Passeriformes: infraorder Furnariidae). *Cladistics* 25: 386–405.
50. Irestedt M, Ohlson JI, Zuccon D, Kallersjo M, Ericson PGP (2006) Nuclear DNA from old collections of avian study skins reveals the evolutionary history of the Old World suboscines (Aves, Passeriformes). *Zool Scr* 35:567–580.
51. Moyle RG, Chesser RT, Prum RO, Schikler P, Cracraft J (2006b) Phylogeny and evolutionary history of Old World Suboscine birds (Aves: Eurylaimidae). *Am Mus Novit* 3544:1–22.
52. Rheindt FE, Norman JA, Christidis L (2008) Phylogenetic relationships of tyrant-flycatchers (Aves: Tyrannidae), with an emphasis on the elaeiniine assemblage. *Mol Phylogenet Evol* 46: 88–101.
53. Rice NH (2005) Phylogenetic relationships of antpitta genera (Passeriformes: Formicariidae). *Auk* 122:673–683.
54. Brumfield RT, Edwards SV (2007) Evolution into and out of the Andes: A Bayesian analysis of historical diversification in *Thamnophilus* antshrikes. *Evolution* 61:346–367.



**Table S3. Specimen data: Basal oscine lineages at 25 Mya**

| Lineages             | Species                           | RAG-1    | References |
|----------------------|-----------------------------------|----------|------------|
| Basal oscines        |                                   |          |            |
| 1                    | <i>Menura novaehollandiae</i>     | AF295191 | 1          |
| 2                    | <i>Atrichornis clamosus</i>       | EF463008 | 2          |
| 3                    | <i>Cormobates placens</i>         | AY064260 | 3          |
| 4                    | <i>Climacteris erythroptera</i>   | AY443268 | 3          |
|                      | <i>Climacteris picumnus</i>       | AY056987 | 3          |
| 5                    | <i>Ailuroedus melanotis</i>       | AY443260 | 3          |
|                      | <i>Ptilonorhynchus violasceus</i> | AY057026 | 3          |
| 6                    | <i>Dasyornis</i>                  | No data  | 4          |
| 7                    | <i>Acanthorhynchus</i>            | No data  | 4          |
| 8                    | <i>Amytornis striatus</i>         | FJ821041 | 5          |
|                      | <i>Malurus melanocephalus</i>     | AY057001 | 3          |
| 9                    | <i>Ephthianura tricolor</i>       | AY443285 | 3          |
|                      | <i>Meliphaga analoga</i>          | AY057003 | 3          |
| 10                   | <i>Pardalotus punctatus</i>       | AY443313 | 3          |
| 11                   | <i>Acanthiza chrysorrhoa</i>      | FJ821039 | 5          |
|                      | <i>Gerygone fusca</i>             | FJ821053 | 5          |
|                      | <i>Sericornis frontalis</i>       | FJ821074 | 5          |
| Transitional oscines |                                   |          |            |
|                      | <i>Orthonyx temminckii</i>        | AY443309 | 3          |
|                      | <i>Microeca papuana</i>           | AY443301 | 3          |
|                      | <i>Chaetops frenatus</i>          | AY443266 | 3          |
|                      | <i>Philesturnus carunculatus</i>  | AY443317 | 3          |
| Passerida            |                                   |          |            |
|                      | <i>Sitta carolinensis</i>         | AY443332 | 3          |
| core Corvoidea       |                                   |          |            |
|                      | <i>Ptiloris magnificus</i>        | AY443325 | 3          |
|                      | <i>Coracina lineata</i>           | AY056988 | 3          |
| Suboscines           |                                   |          |            |
|                      | <i>Pipra coronata</i>             | AY057020 | 3          |
|                      | <i>Pitta sordida</i>              | AY443319 | 3          |
| Acanthisittidae      |                                   |          |            |
|                      | <i>Acanthisitta chloris</i>       | AY056975 | 3          |

List of taxa with GenBank accession numbers that were used for the analyses of basal oscine lineages. References are given to the studies for which the sequences were originally generated.

1. Irestedt M, Johansson US, Parsons TJ, Ericson PGP (2001) Phylogeny of major lineages of suboscines (Passeriformes) analyzed by nuclear DNA sequence data. *J Avian Biol* 32:15–25.
2. Chesser RT, Have JT (2007) On the phylogenetic position of the scrub-birds (Passeriformes: Menurae: Atricornithidae) of Australia. *J Ornithol* 148:471–476.
3. Barker FK, Cibois A, Schikler P, Feinstein J, Cracraft J (2004) Phylogeny and diversification of the largest avian radiation. *Proc Natl Acad Sci USA* 101:11040–11045.
4. Gardner JL, Trueman JWH, Ebert D, Joseph L, Magrath RD (2010) Phylogeny and evolution of the Meliphagoidea, the largest radiation of Australasian songbirds. *Mol Phylogenet Evol* 55:1087–1102.
5. Norman JA, Ericson PGP, Jønsson KA, Fjeldså J, Christidis L (2009) A multi-gene phylogeny reveals novel relationships for aberrant genera of Australo-Papuan core Corvoidea and polyphyly of the Pachycephalidae and Psophodidae (Aves: Passeriformes). *Mol Phylogenet Evol* 52:488–497.
